# Supplementary material for: Insulin Resistance and Truncal Obesity as Important Determinants of the Greater Incidence of Diabetes in Indian Asians and African Caribbeans Compared With Europeans: The Southall And Brent REvisited (SABRE) cohort
Source: PubMed Central journal article supplement — Diabetes Care. 2013 Jan 17;36(2):383–93. doi: 10.2337/dc12-0544 (PMC3554271; doi:10.2337/dc12-0544), 2013-01-17
Supplement: supp_dc12-0544v120544_DC120544SupplementaryData.pdf [file supp_dc12-0544v120544_DC120544SupplementaryData.pdf]

SUPPLEMENTARY DATA

**Supplementary Table 1.** All SABRE study participants (directly followed-up and without diabetes at baseline). Baseline characteristics

| Mean±SD or geometric means (95%CI) unless otherwise stated                                      | Europeans        | Indian Asians     | p †    | African Caribbeans | p † †  |
|-------------------------------------------------------------------------------------------------|------------------|-------------------|--------|--------------------|--------|
| <b>MEN</b> without baseline diabetes                                                            | 1054             | 706               |        | 189                |        |
| Age                                                                                             | 52.4±7.1         | 50.6±6.9          | <0.001 | 53.4±6.0           | 0.057  |
| Smoking, %never/ex/current                                                                      | 28/39/33%        | 28/39/33          | <0.001 | 56/20/24%          | <0.001 |
| Years of education                                                                              | 10.7±2.6         | 12.5±3.7          | <0.001 | 10.7±2.6           | 0.43   |
| Manual occupation                                                                               | 635(40%)         | 532(76%)          | <0.001 | 154(84%)           | <0.001 |
| Years lived in the UK                                                                           | -                | 22.7±11.4         |        | 29.6±5.2           |        |
| Body mass index, kg/m <sup>2</sup>                                                              | 25.9±3.7         | 25.5±3.3          | 0.029  | 26.2±3.2           | 0.23   |
| Waist, cm                                                                                       | 91.2±10.4        | 92.2±9.6          | 0.051  | 88.7±9.5           | 0.003  |
| Thigh circumference, cm                                                                         | 56.7±4.4         | 55.3±4.1          | <0.001 | 58.5±4.6           | <0.001 |
| Waist to hip ratio                                                                              | 0.94±0.06        | 0.98±0.06         | <0.001 | 0.93±0.06          | 0.41   |
| Waist to height ratio                                                                           | 0.52±0.06        | 0.54±0.06         | <0.001 | 0.52±0.05          | 0.103  |
| Truncal skinfold thickness, cm                                                                  | 3.6(3.5, 3.7)    | 4.5(4.4, 4.6)     | <0.001 | 3.9(3.7, 4.2)      | 0.010  |
| Systolic blood pressure, mm Hg                                                                  | 122±16           | 124±17            | 0.009  | 127±16             | <0.001 |
| Diastolic blood pressure, mm Hg                                                                 | 77±11            | 81±11             | <0.001 | 82±12              | <0.001 |
|                                                                                                 |                  |                   |        |                    |        |
| Fasting blood glucose, mmol/l                                                                   | 5.4(5.4, 5.4)    | 5.4(5.4, 5.5)     | 0.041  | 5.5(5.4, 5.6)      | 0.36   |
| Fasting insulin, pmol/l                                                                         | 49.4(47.6, 51.2) | 67.9(65.1, 70.9)  | <0.001 | 52.0(47.4, 57.0)   | 0.29   |
| 2 hour post-challenge glucose, mmol/l                                                           | 4.9(4.8, 4.9)    | 5.2(5.1, 5.3)     | <0.001 | 5.6(5.3, 5.8)      | <0.001 |
| 2 hour post-challenge insulin, pmol/l                                                           | 54.6(46.5, 64.2) | 68.6(56.0, 84.2)  | <0.001 | 49.5(24.8, 98.8)   | <0.001 |
| HOMA 2 insulin resistance                                                                       | 0.82(0.79, 0.85) | 1.11(1.07, 1.16)  | <0.001 | 0.88(0.81, 0.96)   | 0.136  |
| HOMA 2: estimate of % β cell function. median (25 <sup>th</sup> , 75 <sup>th</sup> centiles)    | 71.0(53.5, 91.4) | 86.7(64.5, 113.5) | <0.001 | 74.6(56.2, 89.3)   | 0.49   |
| Matsuda index of insulin resistance                                                             | 0.21(0.20, 0.22) | 0.36(0.34, 0.38)  | <0.001 | 0.26(0.23, 0.28)   | <0.001 |
| HbA1c, %                                                                                        | 5.5(5.5, 5.5)    | 5.7(5.7, 5.8)     | <0.001 | 5.8(5.7, 5.9)      | <0.001 |
|                                                                                                 |                  |                   |        |                    |        |
| Total cholesterol, mmol/l                                                                       | 6.0(5.9, 6.0)    | 5.9(5.8, 5.9)     | 0.015  | 5.5(5.4, 5.6)      | <0.001 |
| Triglycerides, mmol/l                                                                           | 1.5(1.4, 1.5)    | 1.7(1.7, 1.8)     | <0.001 | 1.1(1.0, 1.2)      | <0.001 |
| HDL cholesterol, mmol/l                                                                         | 1.3(1.2, 1.3)    | 1.2(1.1, 1.2)     | <0.001 | 1.4(1.4, 1.5)      | <0.001 |
|                                                                                                 |                  |                   |        |                    |        |
| Family history of diabetes                                                                      | 148(21%)         | 222(43%)          | <0.001 | 48(35%)            | <0.001 |
| Physical activity: leisure time (medians(25 <sup>th</sup> , 75 <sup>th</sup> centiles) MJ/week‡ | 4.0(1.5, 5.9)    | 3.5(1.0, 4.0)     | <0.001 | 3.7(1.2, 4.1)      | 0.009  |
| Physical activity at work, n(%) in most active group‡‡                                          | 244(28%)         | 204(36%)          | <0.001 | 36(26%)            | 0.76   |
|                                                                                                 |                  |                   |        |                    |        |
| <b>WOMEN</b>                                                                                    | 302              | 136               |        | 146                |        |
| Age                                                                                             | 52.6±7.0         | 49.5±6.4          | <0.001 | 52.2±6.3           | 0.62   |
| Smoking, % never/ex/current                                                                     | 47/24/29%        | 97/1/2%           | <0.001 | 81/8/12%           | <0.001 |
| Years of education                                                                              | 10.7±2.8         | 11.0±3.6          | 0.39   | 10.8±3.1           | 0.55   |
| Manual occupation                                                                               | 144(49%)         | 83(68%)           | <0.001 | 80(56%)            | 0.20   |
| Years lived in the UK                                                                           | -                | 20.7±5.1          | -      | 29.8±6.2           | -      |
| Body mass index, kg/m <sup>2</sup>                                                              | 25.8±4.7         | 27.0±4.3          | 0.006  | 29.5±5.3           | <0.001 |
| Waist, cm                                                                                       | 79.3±11.9        | 83.9±10.3         | <0.001 | 88.0±11.9          | <0.001 |
| Thigh circumference, cm                                                                         | 57.9±5.9         | 59.0±5.6          | 0.056  | 63.4±7.2           | <0.001 |
| Waist to hip ratio                                                                              | 0.80±0.08        | 0.85±0.08         | <0.001 | 0.85±0.07          | <0.001 |
| Waist to height ratio                                                                           | 0.49±0.07        | 0.54±0.07         | <0.001 | 0.55±0.08          | <0.001 |
| Truncal skinfold thickness, cm                                                                  | 3.6(3.4, 3.8)    | 6.5(6.2, 6.8)     | <0.001 | 4.9(4.6, 5.3)      | <0.001 |
| Systolic blood pressure, mm Hg                                                                  | 119±17           | 123±22            | 0.040  | 129±16             | <0.001 |
| Diastolic blood pressure, mm Hg                                                                 | 74±10            | 76.6±11           | 0.018  | 81±12              | <0.001 |

## SUPPLEMENTARY DATA

| Mean±SD or geometric means (95%CI) unless otherwise stated                                      | Europeans         | Indian Asians     | p †    | African Caribbeans | p † †  |
|-------------------------------------------------------------------------------------------------|-------------------|-------------------|--------|--------------------|--------|
| Fasting blood glucose, mmol/l                                                                   | 5.3(5.3, 5.3)     | 5.0(4.9, 5.10)    | 0.018  | 5.4(5.3, 5.5)      | <0.001 |
| Fasting insulin, pmol/l                                                                         | 52.0(33.7, 38.8)  | 48.2(44.5, 52.2)  | <0.001 | 63.7(58.3, 70.0)   | <0.001 |
| 2 hour post-challenge glucose, mmol/l                                                           | 5.6(5.5, 5.8)     | 5.5(5.3, 5.7)     | 0.49   | 6.3(6.1, 6.6)      | <0.001 |
| 2 hour post-challenge insulin, pmol/l                                                           | 52.8(21.0, 133.0) | 58.8(33.9, 101.9) | <0.001 | 44.3(29.8, 65.9)   | <0.001 |
| HOMA 2 insulin resistance                                                                       | 0.60(0.56, 0.65)  | 0.78(0.72, 0.84)  | <0.001 | 1.05(0.96, 1.14)   | <0.001 |
| HOMA 2: estimate of % β cell function. Median (25 <sup>th</sup> , 75 <sup>th</sup> centiles)    | 60.0(47.6, 75.3)  | 77.7(65.5, 102.7) | <0.001 | 83.6(61.8, 108.0)  | <0.001 |
| Matsuda index of insulin resistance                                                             | 0.20(0.19, 0.22)  | 0.30(0.27, 0.34)  | <0.001 | 0.37(0.33, 0.40)   | <0.001 |
| HbA1 <sub>c</sub> , %                                                                           | 5.5(5.5, 5.6)     | 5.7(5.6, 5.7)     | <0.001 | 5.8(5.4, 6.2)      | 0.029  |
|                                                                                                 |                   |                   |        |                    |        |
| Total cholesterol, mmol/l                                                                       | 6.0(5.9, 6.1)     | 5.6(5.5, 5.8)     | <0.001 | 5.5(5.3, 5.6)      | <0.001 |
| Triglycerides, mmol/l                                                                           | 1.3(1.2, 1.3)     | 1.3(1.3, 1.4)     | 0.21   | 1.0(1.0, 1.1)      | <0.001 |
| HDL cholesterol, mmol/l                                                                         | 1.6(1.6, 1.6)     | 1.4(1.4, 1.4)     | <0.001 | 1.6(1.6, 1.7)      | 0.156  |
| Family history of diabetes                                                                      | 62(28%)           | 43(40%)           | 0.032  | 65(53%)            | <0.001 |
| Physical activity: leisure time (medians(25 <sup>th</sup> , 75 <sup>th</sup> centiles) MJ/week‡ | 3.7(1.2, 5.0)     | 1.0(1.0, 3.5)     | <0.001 | 3.7(1.2, 4.1)      | 0.78   |
| Physical activity at work, n(%) in most active group‡‡                                          | 50(24%)           | 31(42%)           | 0.005  | 38(39%)            | 0.009  |

Summary of energy expenditure estimation (based on participant questionnaire following this section):

1. Working activity group was estimated from Q5.1; we used q5.1a, 5.1c and 5.1d to compile an index of working activity calculated as follows: (3- q5.1a + Q5.1c+Q5.1d)

This gives scores between 1 and 12, and was categorised as follows:

Not in employment= 0

1-4=1(least vigorous)

5-7=2

8-12=3(most vigorous)

2. Leisure time activity energy expenditure was estimated by summing the following components:

a. Walking was assumed to be at moderate pace (3 miles/hour) pace with energy expenditure 1 MJ/hour

b. Cycling was assumed to be at 5 miles/hour with energy expenditure 1.26 MJ/hour

c. Sporting activities were classified as low (0.76 MJ/hour), medium(1.26 MJ/hour) and high intensity (1.76 MJ/hour) according to the methods used in the Allied Dunbar Fitness survey. Total sporting energy expenditure was estimated using frequency and duration of activity and proportion of year in which the sport was played

Other strenuous activity was assumed to expend 1.76 MJ/hour

**SECTION 5. EXERCISE**

**FOR OFFICE  
USE ONLY**

**5.1 Which of the answers below best describe your activity at work?**

**Please tick one of the boxes in answer to each question.**

- |                             | Never                       | Seldom                      | Sometimes                   | Often                       | Always                      |
|-----------------------------|-----------------------------|-----------------------------|-----------------------------|-----------------------------|-----------------------------|
| (a) Do you sit              | 1. <input type="checkbox"/> | 2. <input type="checkbox"/> | 3. <input type="checkbox"/> | 4. <input type="checkbox"/> | 5. <input type="checkbox"/> |
| (b) Do you stand            | 1. <input type="checkbox"/> | 2. <input type="checkbox"/> | 3. <input type="checkbox"/> | 4. <input type="checkbox"/> | 5. <input type="checkbox"/> |
| (c) Do you walk             | 1. <input type="checkbox"/> | 2. <input type="checkbox"/> | 3. <input type="checkbox"/> | 4. <input type="checkbox"/> | 5. <input type="checkbox"/> |
| (d) Do you lift heavy loads | 1. <input type="checkbox"/> | 2. <input type="checkbox"/> | 3. <input type="checkbox"/> | 4. <input type="checkbox"/> | 5. <input type="checkbox"/> |

|  |    |
|--|----|
|  | 58 |
|  | 59 |
|  | 60 |
|  | 61 |

**5.2 While travelling to and from work, or in your spare time:**

**(a) How many miles do you walk on an average weekday?**

- 1.  Less than 1 mile
- 2.  1 to 3 miles
- 3.  4 miles or more

|  |    |
|--|----|
|  | 62 |
|--|----|

**(b) How many miles do you walk in an average weekend?**

- 1.  Less than 1 mile
- 2.  1 to 3 miles
- 3.  4 miles or more

|  |    |
|--|----|
|  | 63 |
|--|----|

**5.3 (a) Do you ride a bicycle regularly?**

- 1.  Yes
- 2.  No **If No, go to Question 5.4**

|  |    |
|--|----|
|  | 64 |
|--|----|

SUPPLEMENTARY DATA

FOR OFFICE  
USE ONLY

If Yes,

(b) How many miles do you cycle on an average weekday?

- 1.  Less than 2 miles
- 2.  2 to 6 miles
- 3.  7 miles or more

65

(c) How many miles do you cycle in an average weekend?

- 1.  Less than 2 miles
- 2.  2 to 6 miles
- 3.  7 miles or more

66

5.4 (a) Do you play any sport (or other recreational exercise such as swimming or dancing)?

- 1.  Yes
- 2.  No

If No, go to Question 5.6

67

If Yes,

(b) Which sport do you play most frequently?

- |                                                 |                                                      |
|-------------------------------------------------|------------------------------------------------------|
| 01. <input type="checkbox"/> Bowling            | 07. <input type="checkbox"/> Dancing (disco/aerobic) |
| 02. <input type="checkbox"/> Football or rugby  | 08. <input type="checkbox"/> Cricket                 |
| 03. <input type="checkbox"/> Golf               | 09. <input type="checkbox"/> Badminton               |
| 04. <input type="checkbox"/> Swimming           | 10. <input type="checkbox"/> Tennis                  |
| 05. <input type="checkbox"/> Jogging            | 11. <input type="checkbox"/> Squash                  |
| 06. <input type="checkbox"/> Dancing (ballroom) | 12. <input type="checkbox"/> Weight training         |

68 - 69

Other sport - please specify: \_\_\_\_\_

(c) How many hours a week do you play it?

- 1.  Less than 1 hour/week
- 2.  1 to 2 hours/week
- 3.  3-4 hours/week
- 4.  5 hours/week or more

(20)

70

SUPPLEMENTARY DATA

(d) How many months a year?

- 1.  Less than 1 month in a year
- 2.  1 to 3 months/year
- 3.  4 to 6 months/year
- 4.  More than 6 months of the year

FOR OFFICE  
USE ONLY

71

5.5 (a) Do you play a second sport?

- 1.  Yes
- 2.  No If No, go to Question 5.6

72

If Yes,

(b) Which sport is it?

- |                                                 |                                                      |
|-------------------------------------------------|------------------------------------------------------|
| 01. <input type="checkbox"/> Bowling            | 07. <input type="checkbox"/> Dancing (disco/aerobic) |
| 02. <input type="checkbox"/> Football or rugby  | 08. <input type="checkbox"/> Cricket                 |
| 03. <input type="checkbox"/> Golf               | 09. <input type="checkbox"/> Badminton               |
| 04. <input type="checkbox"/> Swimming           | 10. <input type="checkbox"/> Tennis                  |
| 05. <input type="checkbox"/> Jogging            | 11. <input type="checkbox"/> Squash                  |
| 06. <input type="checkbox"/> Dancing (ballroom) | 12. <input type="checkbox"/> Weight training         |

73 - 74

Other sport - please specify: \_\_\_\_\_

(c) How many hours a week do you play it?

- 1.  Less than 1 hour/week
- 2.  1 to 2 hours/week
- 3.  3-4 hours/week
- 4.  5 hours/week or more

75

(d) How many months a year?

- 1.  Less than 1 month in a year
- 2.  1 to 3 months/year
- 3.  4 to 6 months/year
- 4.  More than 6 months of the year

76

SUPPLEMENTARY DATA

FOR OFFICE  
USE ONLY

5.6 For how many hours in an average week do you watch television or video?

- 1.  Less than 1 hour a week
- 2.  1-3 hours a week
- 3.  4-8 hours a week
- 4.  9-15 hours a week
- 5.  16 hours a week or more

 77

5.7 Either at work or in leisure time:

(a) At least once a week do you engage in any regular activity similar to brisk walking, jogging, cycling, etc long enough to work up a sweat?

- 1.  Yes
- 2.  No

 78

If Yes:

(b) How many times per week?

Enter number of times:

5.8 (a) Is your activity limited by any disability?

- 1.  Yes
- 2.  No

 01

If Yes,

(b) Which of these most limits your activity?

- 1.  Old injury
- 2.  Arthritis
- 3.  Back pain
- 4.  Foot problems such as bunions or corns
- 5.  Chest trouble such as asthma or bronchitis
- 6.  Heart trouble
- 7.  Other disability -

 02

Please specify: \_\_\_\_\_
